# Supplementary material for: One-dimensional chains based on linear tetranuclear copper(i) units: reversible structural transformation and luminescence change
Source: Royal Society of Chemistry journal article supplement (doi:10.1039/d0ce00294a), 2020-01-01

## Electronic supporting information

### **One-dimensional chains based on linear tetranuclear copper(I) units: reversible structural transformation and luminescence change**

Chih-Tung Yang,<sup>a</sup> Xiang-Kai Yang,<sup>a</sup> Ji-Hong Hu,<sup>a</sup> Wei-Te Lee,<sup>a</sup>  
Tsun-Ren Chen,<sup>\*b</sup> Chih-Chieh Wang<sup>\*c</sup> and Jhy-Der Chen<sup>\*a</sup>

<sup>a</sup>Department of Chemistry, Chung Yuan Christian University, Chung-Li, Taiwan, R. O. C.

<sup>b</sup>Department of Applied Chemistry, National Pingtung University, Pingtung, Taiwan, R. O. C.

<sup>c</sup>Department of Chemistry, Soochow University, Taipei, Taiwan, R. O. C.

**Fig. S1.** The solid-state UV-visible spectra for **1** and **2** at room temperature.

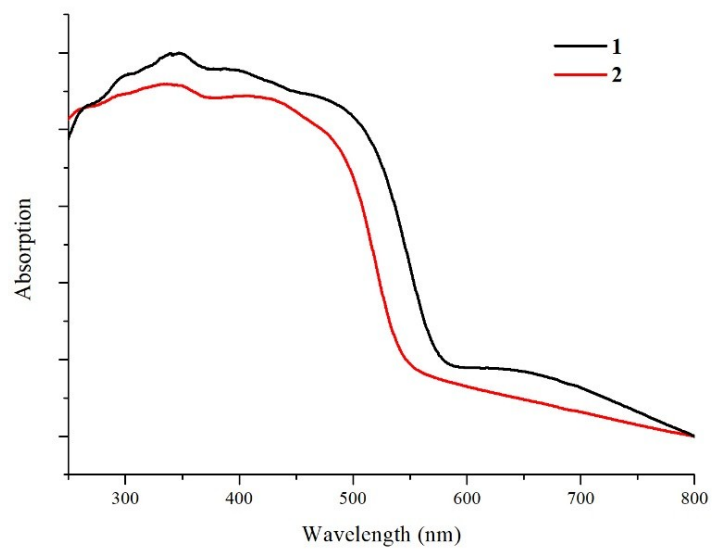

**Fig. S2.** The PXRD patterns of **1**. (a) Simulation and (b) synthesis.

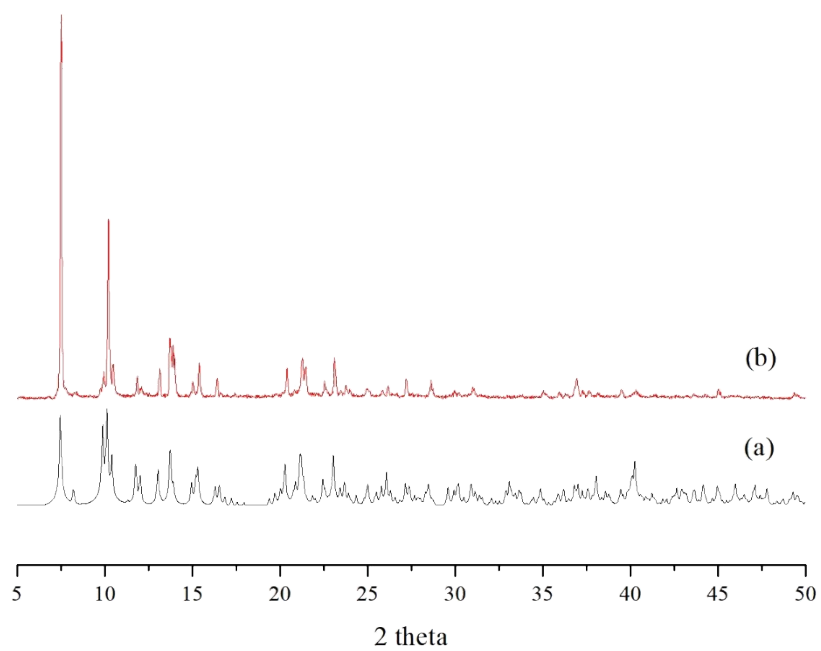

**Fig. S3.** The PXRD patterns of **2**. (a) Simulation and (b) synthesis.

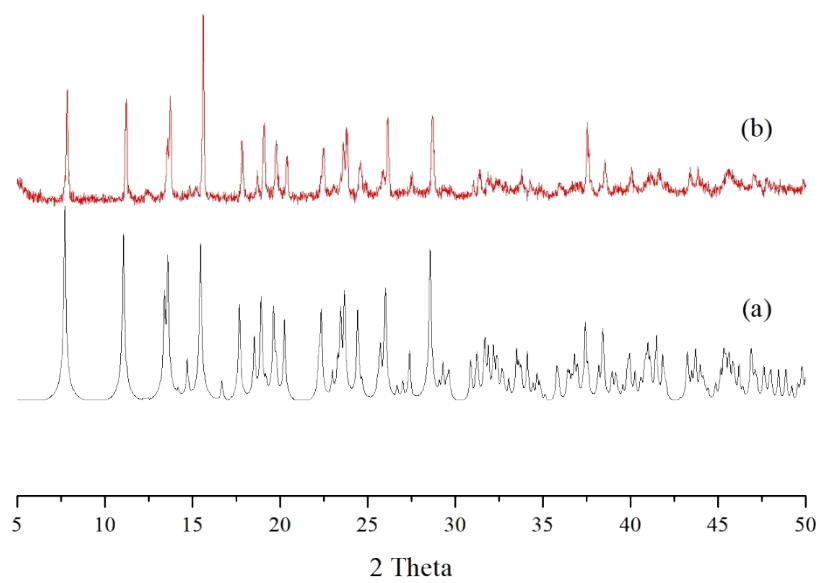

**Fig. S4.** PXRD patterns for complex **1** immersed in various solvents.

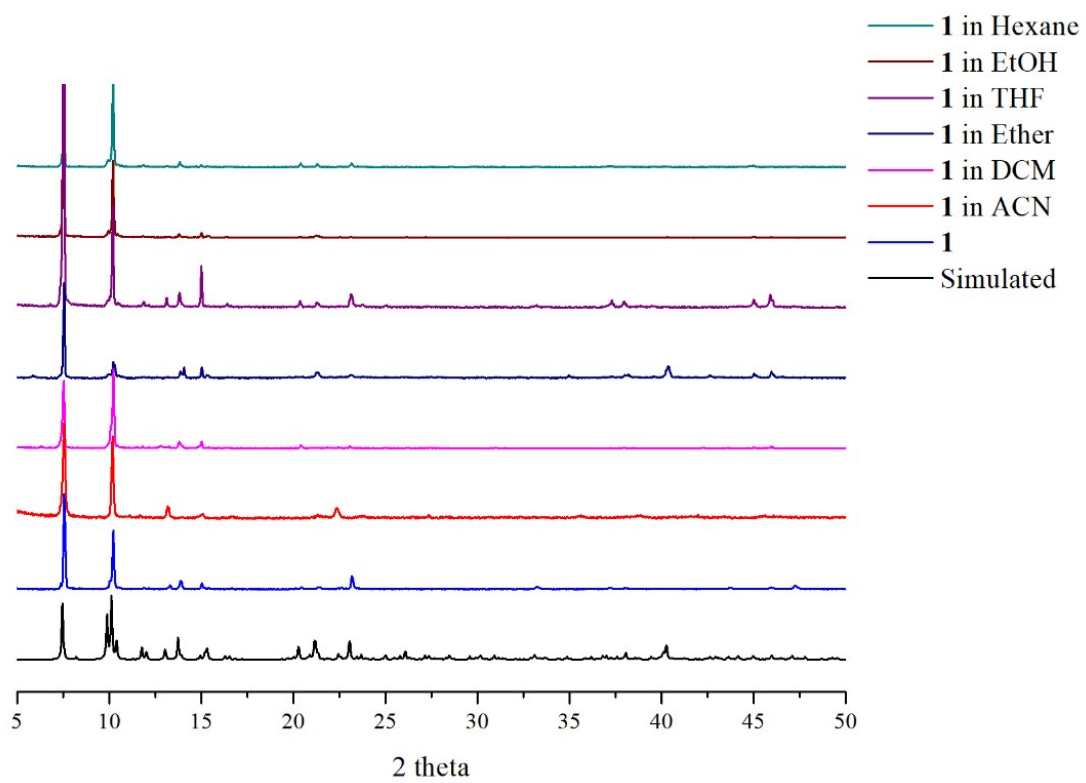

**Fig. S5.** (a) Complex **1** (b) **1** immersed in methanol (c) **1** immersed in methanol then back in DMF (d) **1** immersed in water (e) **1** immersed in water then back in DMF under 365 nm UV light.

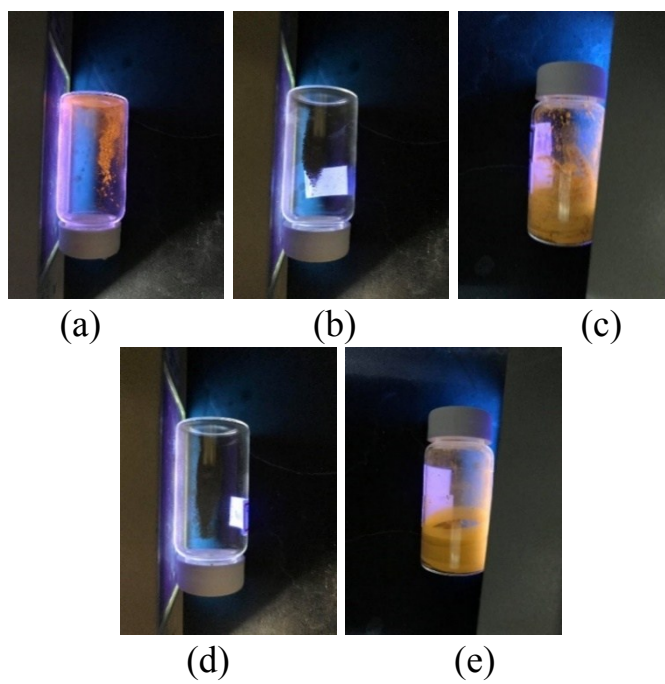

**Fig. S6.** PXRD patterns for **2** after immersed in various solvents.

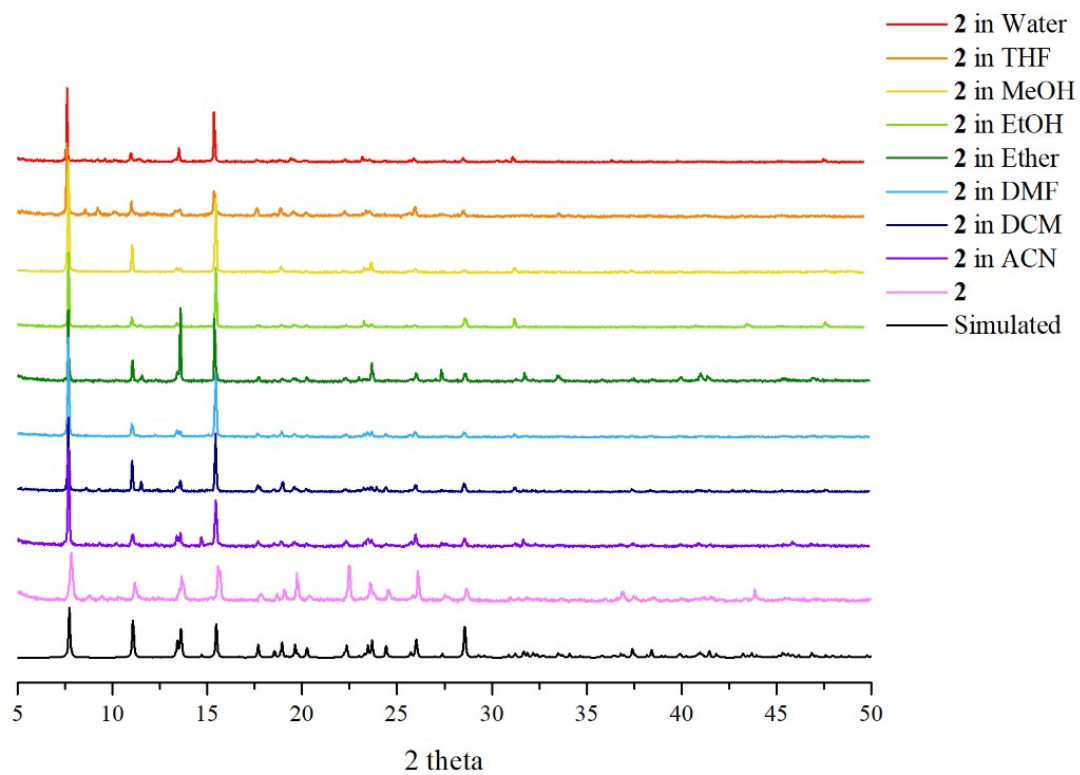

**Fig. S7.** TG analysis for (a) complex **1** and its hydrated product and (b) **2**.

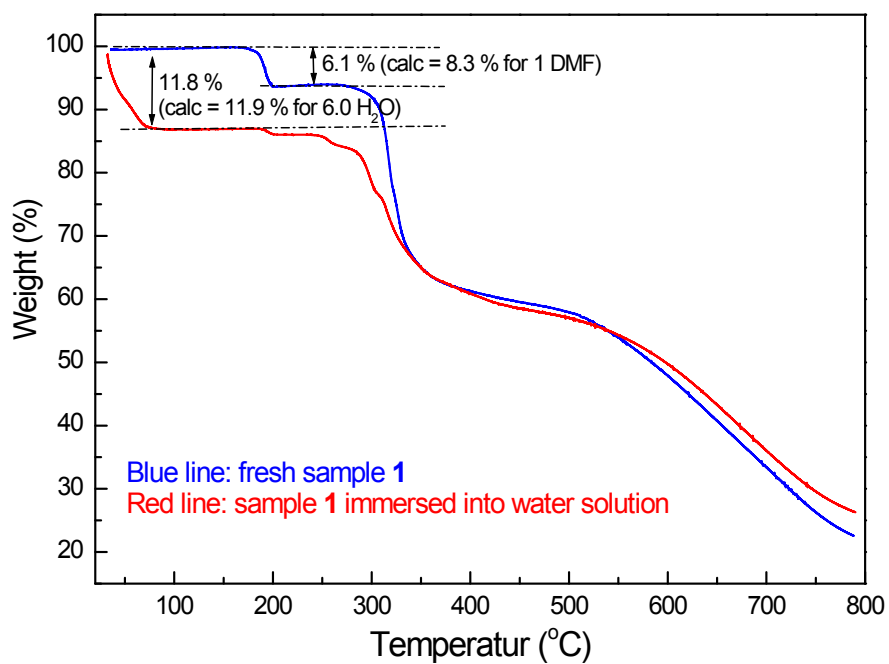

**(a)**

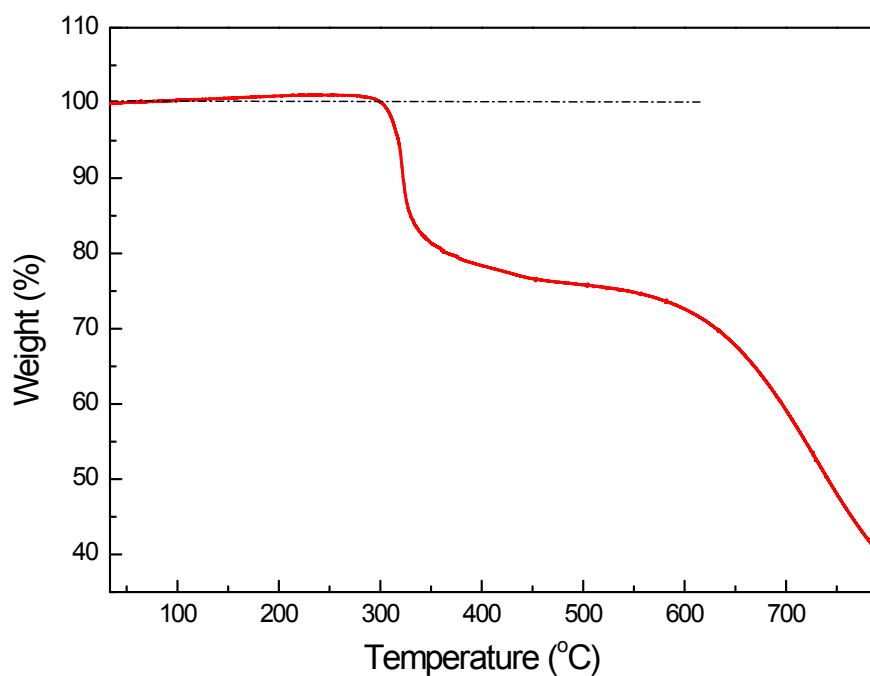

**(b)**



**Fig. S8.** TG measurements of cyclic de-/re-hydration process for **1**.

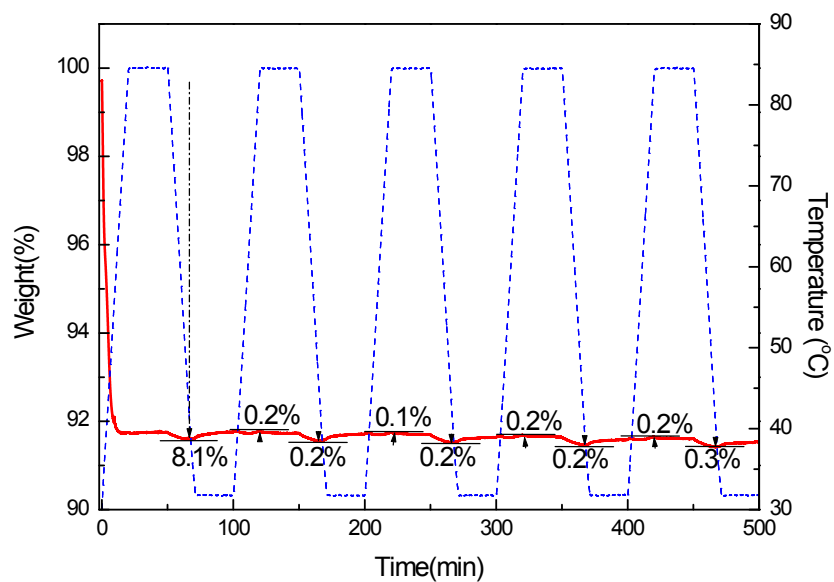

**Fig. S9.** Water-vapor adsorption isotherm for **1**.

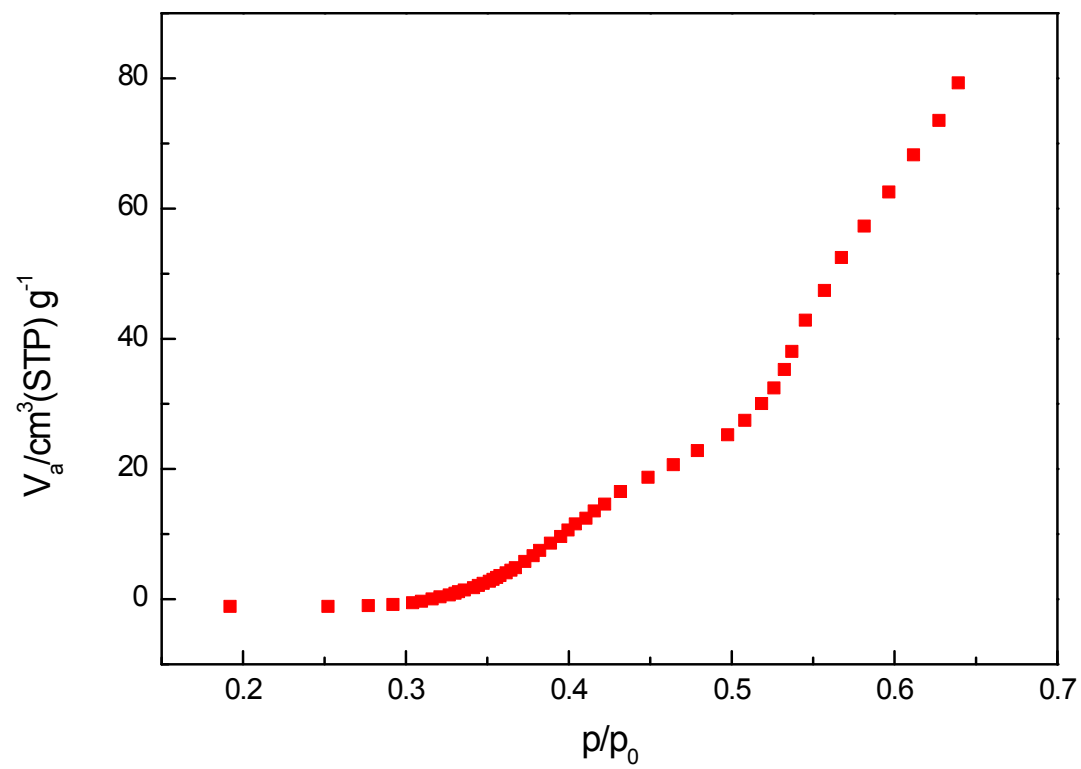

**Fig. S10.** Packing diagram for **1**.

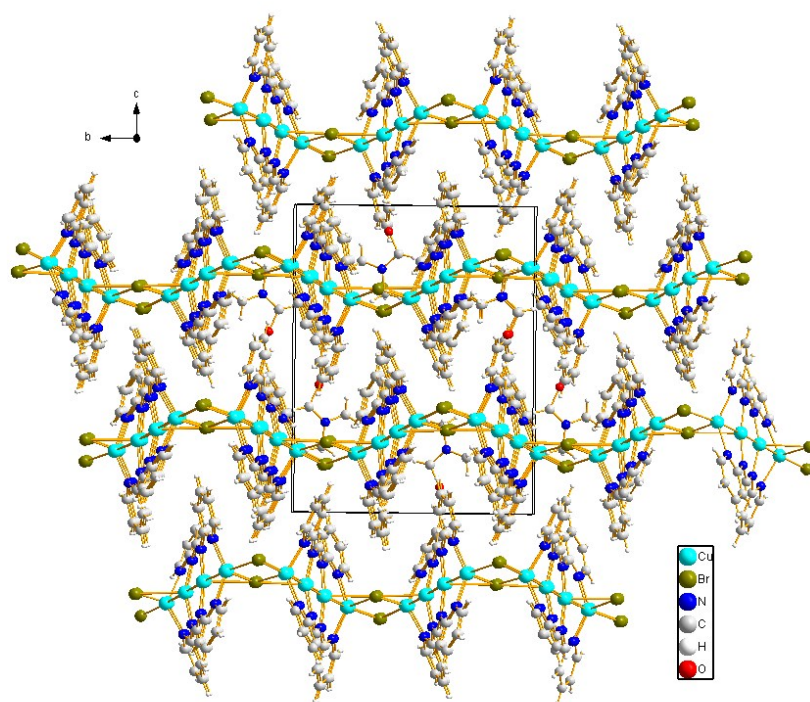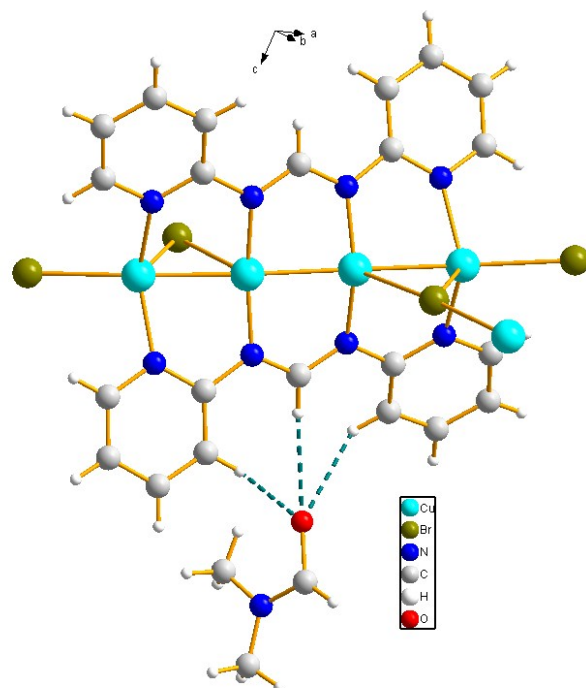

# EDS data for complex 1

Spectrum processing : No peaks omitted

Processing option : All elements analyzed (Normalised)

Number of iterations = 3

Standard :

C CaCO3 1-Jun-1999 12:00 AM  
 N Not defined 1-Jun-1999 12:00 AM  
 O SiO2 1-Jun-1999 12:00 AM  
 Cu Cu 1-Jun-1999 12:00 AM  
 Br KBr 1-Jun-1999 12:00 AM  
 Pt Pt 1-Jun-1999 12:00 AM

| Element | Weight% | Atomic% |
|---------|---------|---------|
| C K     | 26.08   | 58.75   |
| N K     | 9.68    | 18.70   |
| O K     | 2.28    | 3.85    |
| Cu L    | 26.06   | 11.10   |
| Br L    | 13.10   | 4.44    |
| Pt M    | 22.80   | 3.16    |
| Totals  | 100.00  |         |

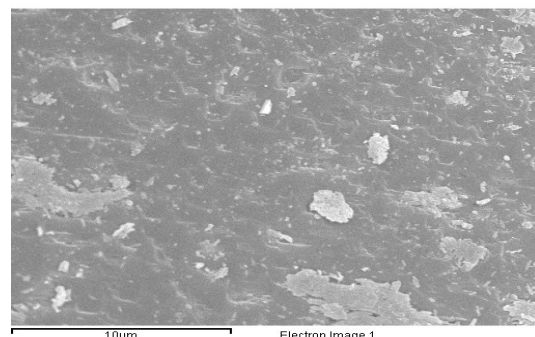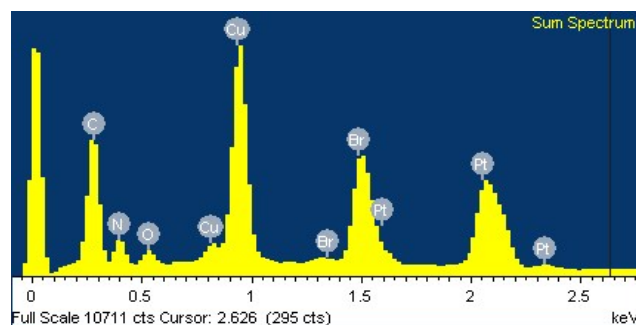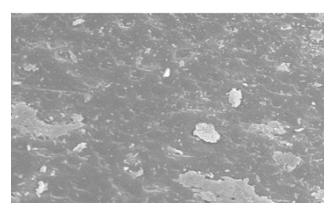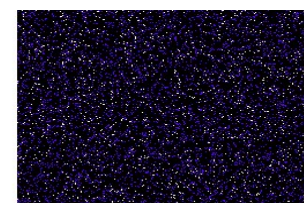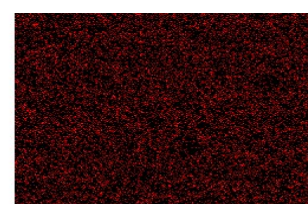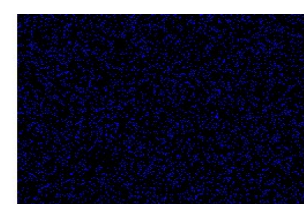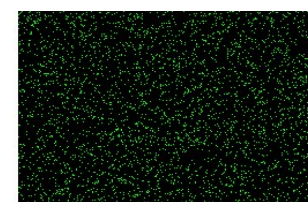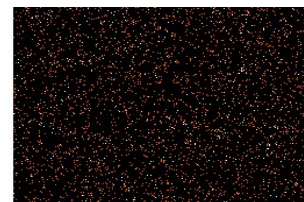

O Ka1

Br La1\_2

## EDS data for complex 2.

Spectrum processing : No peaks omitted

Processing option : All elements analyzed (Normalised)

Number of iterations = 3

Standard :

C CaCO<sub>3</sub> 1-Jun-1999 12:00 AM

N Not defined 1-Jun-1999 12:00 AM

O SiO<sub>2</sub> 1-Jun-1999 12:00 AM

Cu Cu 1-Jun-1999 12:00 AM

I Not defined 1-Jun-1999 12:00 AM

Pt Pt 1-Jun-1999 12:00 AM

| Element | Weight% | Atomic% |
|---------|---------|---------|
| C K     | 22.90   | 60.54   |
| N K     | 6.94    | 15.74   |
| O K     | 1.40    | 2.77    |
| Cu L    | 24.18   | 12.09   |
| I L     | 18.30   | 4.58    |
| Pt M    | 26.28   | 4.28    |
| Totals  | 100.00  |         |

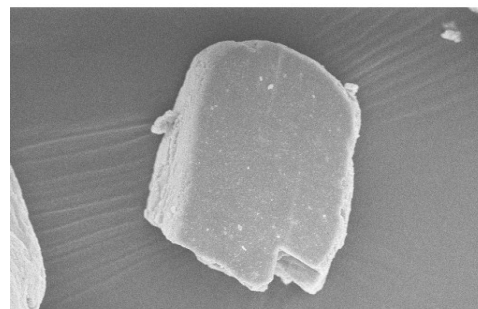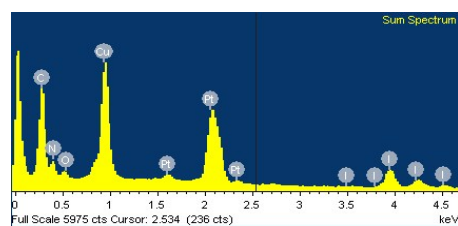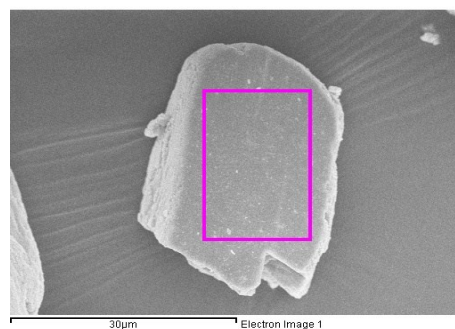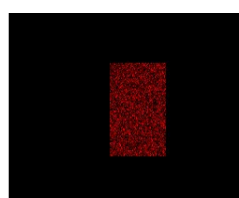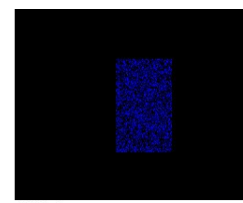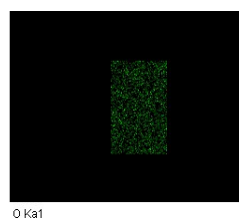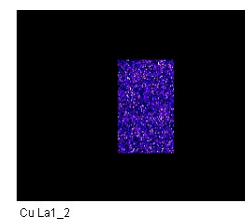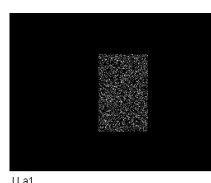

Supplement: d0ce00294a1.pdf [file d0ce00294a1.pdf]
